# Supplementary material for: The Replacement of Fish Meal with Poultry By-Product Meal and Insect Exuviae: Effects on Growth Performance, Gut Health and Microbiota of the European Seabass, Dicentrarchus labrax
Source: MDPI journal article supplement (doi:10.3390/microorganisms12040744), 2024-04-06
Supplement: s1 [file s1]

**Table S1.** The list of bacterial genera that differ between experimental feeds A (control) and B.

| PHYLUM           | CLASS               | ORDER                               | FAMILY                | GENUS                 | A (%) | SD (%) | B (%) | SD (%) | p-value |
|------------------|---------------------|-------------------------------------|-----------------------|-----------------------|-------|--------|-------|--------|---------|
| Actinobacteriota | Actinobacteria      | Micrococcales                       | AKAU3644              | AKAU3644              | 0.01  | 0.01   | 0.64  | 0.02   | 0.0000  |
| Actinobacteriota | Actinobacteria      | Micrococcales                       | Dermabacteraceae      | Brachybacterium       | 0.16  | 0.06   | 1.44  | 0.07   | 0.0001  |
| Actinobacteriota | Actinobacteria      | Actinomycetales                     | Actinomycetaceae      | Actinomyces           | 0.19  | 0.11   | 1.20  | 0.10   | 0.0006  |
| Actinobacteriota | Actinobacteria      | Micrococcales                       | Brevibacteriaceae     | Brevibacterium        | 0.28  | 0.13   | 1.70  | 0.06   | 0.0012  |
| Actinobacteriota | Actinobacteria      | Micrococcales                       | Microbacteriaceae     | Leucobacter           | 0.06  | 0.02   | 0.43  | 0.04   | 0.0019  |
| Actinobacteriota | Actinobacteria      | Micrococcales                       | Micrococcaceae        | Enteractinococcus     | 0.05  | 0.02   | 0.19  | 0.01   | 0.0023  |
| Actinobacteriota | Actinobacteria      | Corynebacteriales                   | Dietziaceae           | Dietzia               | 0.06  | 0.01   | 0.66  | 0.07   | 0.0070  |
| Actinobacteriota | Actinobacteria      | Corynebacteriales                   | Corynebacteriaceae    | Corynebacterium       | 1.62  | 0.74   | 3.72  | 0.19   | 0.0497  |
| Bacteroidota     | Bacteroidia         | Bacteroidales                       | Dysgonomonadaceae     | Dysgonomonadaceae     | 0.03  | 0.01   | 0.36  | 0.02   | 0.0000  |
| Bacteroidota     | Bacteroidia         | Sphingobacteriales                  | Sphingobacteriaceae   | Sphingobacterium      | 0.30  | 0.13   | 2.62  | 0.10   | 0.0001  |
| Bacteroidota     | Bacteroidia         | Flavobacteriales                    | Flavobacteriaceae     | Myroides              | 1.06  | 0.23   | 3.89  | 0.13   | 0.0004  |
| Bacteroidota     | Bacteroidia         | Bacteroidales                       | Dysgonomonadaceae     | Dysgonomonas          | 0.17  | 0.12   | 1.33  | 0.07   | 0.0009  |
| Bacteroidota     | Bacteroidia         | Sphingobacteriales                  | Sphingobacteriaceae   | Pedobacter            | 0.02  | 0.02   | 0.13  | 0.02   | 0.0034  |
| Bacteroidota     | Bacteroidia         | Flavobacteriales                    | Flavobacteriaceae     | Ulvibacter            | 0.02  | 0.01   | 0.38  | 0.05   | 0.0059  |
| Bacteroidota     | Bacteroidia         | Bacteroidales                       | Bacteroidaceae        | Bacteroides           | 0.04  | 0.02   | 0.51  | 0.07   | 0.0066  |
| Desulfobacterota | Desulfovibrionia    | Desulfovibrionales                  | Desulfovibrionaceae   | Desulfovibrio         | 0.00  | 0.01   | 0.14  | 0.01   | 0.0002  |
| Firmicutes       | Clostridia          | Peptostreptococcales-Tissierellales | Sedimentibacteraceae  | Sedimentibacter       | 0.01  | 0.01   | 0.11  | 0.00   | 0.0007  |
| Firmicutes       | Bacilli             | Bacillales                          | Bacillaceae           | Pseudogracilibacillus | 0.70  | 0.23   | 2.72  | 0.18   | 0.0008  |
| Firmicutes       | Bacilli             | Lactobacillales                     | Enterococcaceae       | Enterococcus          | 0.10  | 0.05   | 0.63  | 0.06   | 0.0009  |
| Firmicutes       | Bacilli             | Staphylococcales                    | Staphylococcaceae     | Staphylococcus        | 1.43  | 0.44   | 5.38  | 0.23   | 0.0014  |
| Firmicutes       | Bacilli             | RsaHf231                            | RsaHf231              | RsaHf231              | 0.01  | 0.01   | 0.16  | 0.02   | 0.0020  |
| Firmicutes       | Bacilli             | Bacillales                          | Bacillaceae           | Bacillus              | 1.15  | 0.12   | 2.09  | 0.16   | 0.0032  |
| Firmicutes       | Bacilli             | Erysipelotrichales                  | Erysipelotrichaceae   | Erysipelothrix        | 0.41  | 0.32   | 2.20  | 0.21   | 0.0043  |
| Firmicutes       | Bacilli             | Bacillales                          | Bacillaceae           | Amphibacillus         | 0.08  | 0.04   | 0.31  | 0.02   | 0.0062  |
| Firmicutes       | Clostridia          | Peptostreptococcales-Tissierellales | Peptostreptococcaceae | Clostridioides        | 0.07  | 0.04   | 0.25  | 0.01   | 0.0153  |
| Firmicutes       | Clostridia          | Lachnospirales                      | Lachnospiraceae       | Lachnoclostridium     | 0.02  | 0.02   | 0.11  | 0.03   | 0.0273  |
| Firmicutes       | Clostridia          | Oscillospirales                     | Ruminococcaceae       | Incertae_Sedis        | 0.01  | 0.01   | 0.08  | 0.02   | 0.0300  |
| Proteobacteria   | Gammaproteobacteria | Enterobacterales                    | Morganellaceae        | Providencia           | 1.14  | 0.62   | 12.29 | 0.56   | 0.0001  |

|                |                     |                   |                       |                  |      |      |      |      |        |
|----------------|---------------------|-------------------|-----------------------|------------------|------|------|------|------|--------|
| Proteobacteria | Gammaproteobacteria | Pseudomonadales   | Pseudomonadaceae      | Oblitimonas      | 0.19 | 0.12 | 1.32 | 0.14 | 0.0010 |
| Proteobacteria | Gammaproteobacteria | Cardiobacteriales | Wohlfahrtiimonadaceae | Ignatzschineria  | 0.83 | 0.38 | 5.12 | 0.54 | 0.0013 |
| Proteobacteria | Gammaproteobacteria | Enterobacterales  | Yersiniaceae          | Serratia         | 0.09 | 0.06 | 0.64 | 0.03 | 0.0017 |
| Proteobacteria | Gammaproteobacteria | Burkholderiales   | Alcaligenaceae        | Paenalcaligenes  | 0.24 | 0.11 | 1.28 | 0.15 | 0.0019 |
| Proteobacteria | Gammaproteobacteria | Aeromonadales     | Aeromonadaceae        | Aeromonas        | 0.15 | 0.09 | 1.97 | 0.20 | 0.0022 |
| Proteobacteria | Gammaproteobacteria | Burkholderiales   | Alcaligenaceae        | Alcaligenes      | 0.26 | 0.02 | 1.47 | 0.12 | 0.0035 |
| Proteobacteria | Gammaproteobacteria | Enterobacterales  | Morganellaceae        | Proteus          | 1.49 | 0.83 | 7.20 | 0.24 | 0.0068 |
| Proteobacteria | Gammaproteobacteria | Enterobacterales  | Morganellaceae        | Morganella       | 0.12 | 0.07 | 1.99 | 0.33 | 0.0122 |
| Proteobacteria | Alphaproteobacteria | Rhizobiales       | Rhizobiaceae          | Paenochrobactrum | 0.08 | 0.05 | 0.41 | 0.06 | 0.0044 |
