# Supplementary material for: The Replacement of Fish Meal with Poultry By-Product Meal and Insect Exuviae: Effects on Growth Performance, Gut Health and Microbiota of the European Seabass, Dicentrarchus labrax
Source: MDPI journal article supplement (doi:10.3390/microorganisms12040744), 2024-04-06
Supplement: s1 [file s1]

**Table S2.** The list of bacterial genera that differ between experimental feeds A (control) and C.

| PHYLUM           | CLASS               | ORDER                               | FAMILY               | GENUS                        | A (%) | SD (%) | C (%) | SD (%) | p-value |
|------------------|---------------------|-------------------------------------|----------------------|------------------------------|-------|--------|-------|--------|---------|
| Actinobacteriota | Actinobacteria      | Actinomycetales                     | Actinomycetaceae     | Actinomyces                  | 0.19  | 0.11   | 3.01  | 0.22   | 0.0006  |
| Bacteroidota     | Bacteroidia         | Bacteroidales                       | Bacteroidaceae       | Bacteroides                  | 0.04  | 0.02   | 1.27  | 0.05   | 0.0001  |
| Bacteroidota     | Bacteroidia         | Bacteroidales                       | Dysgonomonadaceae    | Dysgonomonadaceae            | 0.03  | 0.01   | 1.93  | 0.06   | 0.0002  |
| Bacteroidota     | Bacteroidia         | Bacteroidales                       | Dysgonomonadaceae    | Dysgonomonas                 | 0.17  | 0.12   | 2.90  | 0.44   | 0.0090  |
| Bacteroidota     | Bacteroidia         | Flavobacteriales                    | Flavobacteriaceae    | Myroides                     | 1.06  | 0.23   | 0.10  | 0.04   | 0.0244  |
| Firmicutes       | Clostridia          | Oscillospirales                     | Ruminococcaceae      | Incertae_Sedis               | 0.01  | 0.01   | 0.23  | 0.01   | 0.0000  |
| Firmicutes       | Bacilli             | Bacillales                          | Planococcaceae       | Sporosarcina                 | 0.41  | 0.17   | 2.54  | 0.21   | 0.0004  |
| Firmicutes       | Clostridia          | Lachnospirales                      | Lachnospiraceae      | Lachnoclostridium            | 0.02  | 0.02   | 0.17  | 0.02   | 0.0019  |
| Firmicutes       | Clostridia          | Peptostreptococcales-Tissierellales | Sedimentibacteraceae | Sedimentibacter              | 0.01  | 0.01   | 0.11  | 0.01   | 0.0040  |
| Firmicutes       | Bacilli             | Bacillales                          | Bacillaceae          | Bacillus                     | 1.15  | 0.12   | 21.97 | 1.98   | 0.0044  |
| Firmicutes       | Bacilli             | Bacillales                          | Bacillaceae          | Ureibacillus                 | 0.23  | 0.10   | 12.00 | 1.37   | 0.0065  |
| Firmicutes       | Negativicutes       | Acidaminococcales                   | Acidaminococcaceae   | Phascolarctobacterium        | 0.01  | 0.01   | 0.14  | 0.04   | 0.0303  |
| Firmicutes       | Clostridia          | Clostridiales                       | Clostridiaceae       | Clostridium_sensu_stricto_18 | 0.10  | 0.03   | 0.02  | 0.02   | 0.0416  |
| Firmicutes       | Bacilli             | RsaHf231                            | RsaHf231             | RsaHf231                     | 0.01  | 0.01   | 0.06  | 0.02   | 0.0443  |
| Firmicutes       | Bacilli             | Staphylococcales                    | Staphylococcaceae    | Staphylococcus               | 1.43  | 0.44   | 0.16  | 0.12   | 0.0460  |
| Proteobacteria   | Gammaproteobacteria | Burkholderiales                     | Alcaligenaceae       | Alcaligenes                  | 0.26  | 0.02   | 0.05  | 0.01   | 0.0027  |
